# Supplementary material for: The role of tautomers in the UV absorption of urocanic acid
Source: Royal Society of Chemistry journal article supplement (doi:10.1039/c0cp02142c), 2011-01-01
Supplement: c0cp02142c.pdf [file c0cp02142c.pdf]

**Supplementary Information**

# The role of tautomers in the UV absorption of urocanic acid

Mario Barbatti

## IR spectra of *cis* isomers of urocanic acid

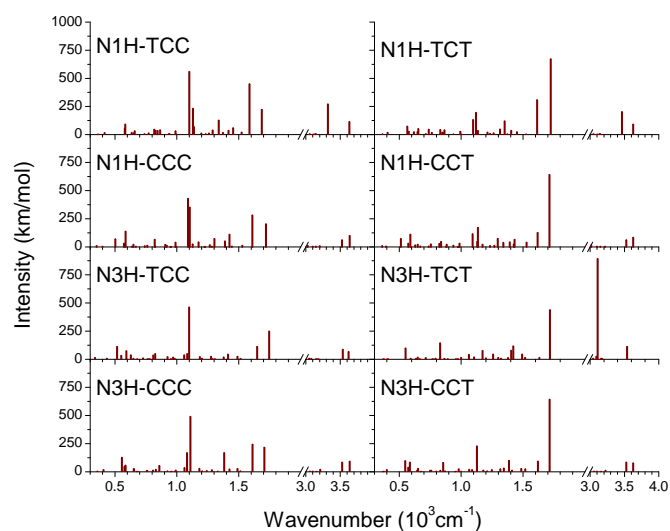

IR spectra (fundamental frequencies) of the *trans* tautomers of urocanic acid computed at B3LYP/TZVP level. wavenumbers above  $1000\text{ cm}^{-1}$  were multiplied by a factor 0.97.

## Cartesian geometries (Angstrom)

Optimized at B3LYP/TZVP

16

N1H-TTC

|   |           |           |           |
|---|-----------|-----------|-----------|
| n | 0.059104  | -1.333098 | -2.171376 |
| c | 0.035511  | -2.654612 | -2.485868 |
| n | 0.119149  | -3.416187 | -1.415749 |
| c | 0.199035  | -2.551170 | -0.364109 |
| c | 0.164963  | -1.234981 | -0.792203 |
| c | 0.225973  | -0.020684 | -0.038833 |
| c | 0.209576  | 1.238047  | -0.513598 |
| c | 0.280864  | 2.379916  | 0.404944  |
| o | 0.346968  | 2.330650  | 1.612850  |
| o | 0.265027  | 3.562164  | -0.272406 |
| h | -0.043945 | -3.006999 | -3.502511 |
| h | 0.003586  | -0.565999 | -2.821584 |
| h | 0.278851  | -2.902144 | 0.652838  |
| h | 0.294397  | -0.146539 | 1.037315  |
| h | 0.148304  | 1.471585  | -1.569538 |
| h | 0.314591  | 4.266302  | 0.392498  |

16

N1H-TTT

|   |           |           |           |
|---|-----------|-----------|-----------|
| n | 0.070629  | -1.328595 | -2.168061 |
| c | 0.060877  | -2.654072 | -2.467022 |
| n | 0.133514  | -3.402167 | -1.386750 |
| c | 0.191407  | -2.523847 | -0.344564 |
| c | 0.154722  | -1.213365 | -0.789062 |
| c | 0.194402  | 0.012489  | -0.050018 |
| c | 0.177395  | 1.260469  | -0.554613 |
| c | 0.222625  | 2.478607  | 0.256622  |
| o | 0.259613  | 2.248144  | 1.599081  |
| o | 0.227845  | 3.600290  | -0.201368 |
| h | -0.000751 | -3.018785 | -3.480655 |
| h | 0.019829  | -0.570185 | -2.828794 |
| h | 0.258256  | -2.862525 | 0.677521  |
| h | 0.244636  | -0.107136 | 1.026353  |
| h | 0.134446  | 1.460295  | -1.618564 |
| h | 0.292032  | 3.117103  | 2.026926  |

16

N1H-CTT

|   |           |           |           |
|---|-----------|-----------|-----------|
| n | 0.015663  | -1.251304 | -2.092191 |
| c | 0.069570  | -2.534329 | -2.530456 |
| n | 0.161631  | -3.385741 | -1.529462 |
| c | 0.165536  | -2.623025 | -0.399760 |
| c | 0.074654  | -1.275182 | -0.704984 |
| c | 0.040258  | -0.074071 | 0.082367  |
| c | 0.057854  | -0.009293 | 1.425296  |
| c | 0.022376  | 1.242251  | 2.184600  |
| o | -0.012849 | 2.363516  | 1.406228  |
| o | 0.022772  | 1.306026  | 3.393738  |
| h | 0.038963  | -2.794731 | -3.576723 |
| h | -0.059718 | -0.426194 | -2.665927 |
| h | 0.236585  | -3.072730 | 0.577637  |
| h | -0.004455 | 0.862052  | -0.466485 |
| h | 0.095781  | -0.896767 | 2.043500  |
| h | -0.037913 | 3.117470  | 2.014504  |

16  
N1H-CTC

|   |           |           |           |
|---|-----------|-----------|-----------|
| n | 0.011960  | -1.274904 | -2.105590 |
| c | 0.087130  | -2.559491 | -2.534140 |
| n | 0.187444  | -3.402567 | -1.526295 |
| c | 0.175483  | -2.631970 | -0.402563 |
| c | 0.066109  | -1.287520 | -0.717994 |
| c | 0.008827  | -0.080419 | 0.055242  |
| c | 0.033014  | 0.018393  | 1.394984  |
| c | -0.033203 | 1.337782  | 2.034535  |
| o | -0.107591 | 2.408263  | 1.471184  |
| o | -0.001852 | 1.235058  | 3.390913  |
| h | 0.065252  | -2.828130 | -3.578617 |
| h | -0.071776 | -0.453650 | -2.683886 |
| h | 0.247610  | -3.073268 | 0.578666  |
| h | -0.061887 | 0.853363  | -0.498156 |
| h | 0.098706  | -0.845345 | 2.043410  |
| h | -0.048799 | 2.137741  | 3.742240  |

16  
N3H-TTC

|   |           |           |           |
|---|-----------|-----------|-----------|
| n | 0.049499  | -1.260294 | -2.157664 |
| c | 0.124778  | -2.504856 | -2.538362 |
| n | 0.221933  | -3.356588 | -1.469108 |
| c | 0.206111  | -2.586091 | -0.334954 |
| c | 0.098464  | -1.282945 | -0.773620 |
| c | 0.041250  | -0.092994 | 0.040770  |
| c | -0.061141 | 1.155552  | -0.437002 |
| c | -0.111989 | 2.304548  | 0.475100  |
| o | -0.080700 | 2.273835  | 1.686337  |
| o | -0.202759 | 3.477168  | -0.212322 |
| h | 0.114896  | -2.857980 | -3.557623 |
| h | 0.291922  | -4.360735 | -1.507421 |
| h | 0.269899  | -3.007670 | 0.653591  |
| h | 0.084940  | -0.229392 | 1.117327  |
| h | -0.107646 | 1.348144  | -1.499920 |
| h | -0.232754 | 4.185556  | 0.448766  |

16  
N3H-TTT

|   |          |           |           |
|---|----------|-----------|-----------|
| n | 0.147539 | -1.281078 | -2.185706 |
| c | 0.149003 | -2.543882 | -2.510699 |
| n | 0.199369 | -3.351277 | -1.404842 |
| c | 0.231521 | -2.531688 | -0.306325 |
| c | 0.199073 | -1.245027 | -0.802447 |
| c | 0.216514 | -0.020189 | -0.037368 |
| c | 0.200344 | 1.212011  | -0.568225 |
| c | 0.223966 | 2.444461  | 0.223915  |
| o | 0.232145 | 2.238541  | 1.574699  |
| o | 0.236187 | 3.561082  | -0.245151 |
| h | 0.115048 | -2.940755 | -3.513443 |
| h | 0.211514 | -4.358455 | -1.397550 |
| h | 0.274365 | -2.913532 | 0.699439  |
| h | 0.246747 | -0.128581 | 1.041489  |
| h | 0.174111 | 1.357606  | -1.639953 |
| h | 0.252451 | 3.117447  | 1.982098  |

16  
 N3H-CTT

|   |           |           |           |
|---|-----------|-----------|-----------|
| n | 0.070443  | -1.225323 | -2.100591 |
| c | 0.123997  | -2.457158 | -2.528158 |
| n | 0.200809  | -3.344680 | -1.487988 |
| c | 0.194438  | -2.619073 | -0.327282 |
| c | 0.112033  | -1.297249 | -0.717405 |
| c | 0.068602  | -0.089009 | 0.076348  |
| c | 0.065417  | -0.016017 | 1.416697  |
| c | 0.017905  | 1.235948  | 2.176707  |
| o | 0.001432  | 2.357175  | 1.403302  |
| o | -0.005869 | 1.295753  | 3.387222  |
| h | 0.111706  | -2.773855 | -3.559101 |
| h | 0.254801  | -4.348431 | -1.558999 |
| h | 0.249708  | -3.087280 | 0.640321  |
| h | 0.033141  | 0.826402  | -0.503295 |
| h | 0.091841  | -0.898602 | 2.043941  |
| h | -0.035276 | 3.109309  | 2.013060  |

16  
 N3H-CTC

|   |           |           |           |
|---|-----------|-----------|-----------|
| n | 0.038615  | -1.255930 | -2.123078 |
| c | 0.111615  | -2.493125 | -2.531076 |
| n | 0.223741  | -3.361686 | -1.477833 |
| c | 0.219752  | -2.617078 | -0.329373 |
| c | 0.102221  | -1.303762 | -0.739563 |
| c | 0.046145  | -0.085244 | 0.035449  |
| c | 0.029381  | 0.016623  | 1.373026  |
| c | -0.022108 | 1.330636  | 2.026443  |
| o | -0.034603 | 2.412305  | 1.483554  |
| o | -0.056417 | 1.205257  | 3.384723  |
| h | 0.090076  | -2.827171 | -3.556421 |
| h | 0.301098  | -4.364828 | -1.533642 |
| h | 0.303510  | -3.067283 | 0.644676  |
| h | 0.012125  | 0.827913  | -0.550246 |
| h | 0.048096  | -0.848075 | 2.024712  |
| h | -0.088406 | 2.104748  | 3.745476  |

Optimized at MP2/TZVP

16  
 N1H-TTC

|   |           |           |           |
|---|-----------|-----------|-----------|
| n | 0.004141  | -1.313154 | -2.148075 |
| c | 0.071043  | -2.628134 | -2.497070 |
| n | 0.253754  | -3.409448 | -1.445584 |
| c | 0.289929  | -2.556859 | -0.377657 |
| c | 0.103871  | -1.240350 | -0.775729 |
| c | 0.183887  | -0.025528 | -0.015542 |
| c | 0.260671  | 1.220546  | -0.516017 |
| c | 0.304899  | 2.375893  | 0.394334  |
| o | 0.309678  | 2.336512  | 1.606335  |
| o | 0.339820  | 3.542800  | -0.305016 |
| h | -0.018413 | -2.958674 | -3.518845 |
| h | -0.216128 | -0.548219 | -2.767540 |
| h | 0.427407  | -2.917202 | 0.629254  |
| h | 0.178255  | -0.138798 | 1.064184  |
| h | 0.288225  | 1.430753  | -1.577502 |
| h | 0.369700  | 4.247715  | 0.361106  |

16  
 N1H-TTT

|   |           |           |           |
|---|-----------|-----------|-----------|
| n | -0.014257 | -1.311306 | -2.146348 |
| c | 0.052521  | -2.631725 | -2.473355 |
| n | 0.198013  | -3.398550 | -1.405264 |

|         |           |           |           |
|---------|-----------|-----------|-----------|
| c       | 0.213713  | -2.529658 | -0.350313 |
| c       | 0.047451  | -1.217953 | -0.773026 |
| c       | 0.138331  | 0.008639  | -0.031363 |
| c       | 0.186763  | 1.245752  | -0.560504 |
| c       | 0.259023  | 2.471646  | 0.243428  |
| o       | 0.122581  | 2.249023  | 1.578938  |
| o       | 0.420160  | 3.582046  | -0.220873 |
| h       | -0.011177 | -2.977227 | -3.492106 |
| h       | -0.200818 | -0.553228 | -2.785027 |
| h       | 0.320907  | -2.875603 | 0.665269  |
| h       | 0.142108  | -0.097056 | 1.047613  |
| h       | 0.212276  | 1.423646  | -1.628488 |
| h       | 0.229305  | 3.117330  | 1.997011  |
| 16      |           |           |           |
| N1H-CTT |           |           |           |
| n       | -0.019570 | -1.257403 | -2.089514 |
| c       | 0.077659  | -2.544513 | -2.521081 |
| n       | 0.265732  | -3.383726 | -1.514996 |
| c       | 0.272292  | -2.600918 | -0.394711 |
| c       | 0.059748  | -1.266607 | -0.712800 |
| c       | 0.060667  | -0.055572 | 0.069354  |
| c       | -0.168565 | -0.011810 | 1.394033  |
| c       | -0.113851 | 1.225959  | 2.182575  |
| o       | -0.027462 | 2.350427  | 1.416925  |
| o       | -0.147307 | 1.265216  | 3.395150  |
| h       | 0.012361  | -2.812944 | -3.562471 |
| h       | -0.236794 | -0.452852 | -2.658682 |
| h       | 0.430811  | -3.024053 | 0.583911  |
| h       | 0.233139  | 0.878427  | -0.456611 |
| h       | -0.360645 | -0.907854 | 1.970013  |
| h       | 0.041439  | 3.084586  | 2.046528  |
| 16      |           |           |           |
| N1H-CTC |           |           |           |
| n       | -0.043685 | -1.289004 | -2.098058 |
| c       | 0.071677  | -2.581157 | -2.508778 |
| n       | 0.317543  | -3.395882 | -1.494852 |
| c       | 0.343198  | -2.591490 | -0.390487 |
| c       | 0.088127  | -1.268932 | -0.725683 |
| c       | 0.068023  | -0.046734 | 0.035806  |
| c       | -0.128831 | 0.024323  | 1.363247  |
| c       | -0.080938 | 1.333029  | 2.036558  |
| o       | 0.026276  | 2.413964  | 1.495050  |
| o       | -0.178340 | 1.191089  | 3.384514  |
| h       | -0.021182 | -2.871194 | -3.542218 |
| h       | -0.296890 | -0.500084 | -2.674410 |
| h       | 0.547794  | -2.990098 | 0.589836  |
| h       | 0.206054  | 0.888447  | -0.501567 |
| h       | -0.294359 | -0.854266 | 1.972616  |
| h       | -0.148742 | 2.090409  | 3.747702  |
| 16      |           |           |           |
| N3H-TTC |           |           |           |
| n       | 0.048200  | -1.246589 | -2.153933 |
| c       | 0.125288  | -2.504159 | -2.534749 |
| n       | 0.222096  | -3.353277 | -1.469017 |
| c       | 0.205837  | -2.588027 | -0.333753 |
| c       | 0.096605  | -1.280955 | -0.773818 |
| c       | 0.041874  | -0.091569 | 0.043905  |
| c       | -0.061637 | 1.153247  | -0.447962 |
| c       | -0.111927 | 2.301741  | 0.469774  |
| o       | -0.079683 | 2.260458  | 1.683311  |
| o       | -0.202496 | 3.473609  | -0.216681 |
| h       | 0.116069  | -2.856974 | -3.552932 |

|         |           |           |           |
|---------|-----------|-----------|-----------|
| h       | 0.291758  | -4.358329 | -1.510392 |
| h       | 0.269223  | -3.012700 | 0.653411  |
| h       | 0.085301  | -0.221645 | 1.121346  |
| h       | -0.107538 | 1.336197  | -1.512512 |
| h       | -0.230530 | 4.169140  | 0.459052  |
| 16      |           |           |           |
| N3H-TTT |           |           |           |
| n       | 0.081229  | -1.261018 | -2.167443 |
| c       | 0.141677  | -2.531694 | -2.504778 |
| n       | 0.240939  | -3.343987 | -1.410787 |
| c       | 0.239454  | -2.539590 | -0.302732 |
| c       | 0.127532  | -1.248064 | -0.786945 |
| c       | 0.188361  | -0.024962 | -0.018455 |
| c       | 0.173979  | 1.199505  | -0.571973 |
| c       | 0.218584  | 2.438853  | 0.211819  |
| o       | 0.066879  | 2.238824  | 1.553636  |
| o       | 0.369618  | 3.547402  | -0.260978 |
| h       | 0.116614  | -2.920062 | -3.509713 |
| h       | 0.271739  | -4.351861 | -1.416589 |
| h       | 0.300883  | -2.931680 | 0.697943  |
| h       | 0.215315  | -0.120622 | 1.061577  |
| h       | 0.158778  | 1.323915  | -1.646216 |
| h       | 0.167049  | 3.116797  | 1.952105  |
| 16      |           |           |           |
| N3H-CTT |           |           |           |
| n       | 0.280327  | -1.220961 | -2.101924 |
| c       | 0.320721  | -2.476070 | -2.501914 |
| n       | 0.157217  | -3.342717 | -1.459862 |
| c       | -0.009258 | -2.597690 | -0.323542 |
| c       | 0.087059  | -1.279760 | -0.735984 |
| c       | 0.005093  | -0.067015 | 0.052506  |
| c       | 0.229759  | -0.008334 | 1.375843  |
| c       | 0.080871  | 1.213432  | 2.177060  |
| o       | -0.071187 | 2.338744  | 1.427626  |
| o       | 0.091547  | 1.237104  | 3.391791  |
| h       | 0.462171  | -2.812490 | -3.515626 |
| h       | 0.114939  | -4.348496 | -1.521979 |
| h       | -0.184016 | -3.046311 | 0.639176  |
| h       | -0.222236 | 0.839770  | -0.495948 |
| h       | 0.486331  | -0.888741 | 1.951898  |
| h       | -0.202669 | 3.056161  | 2.066321  |
| 16      |           |           |           |
| N3H-CTC |           |           |           |
| n       | 0.012485  | -1.251641 | -2.120851 |
| c       | 0.020813  | -2.514615 | -2.496847 |
| n       | 0.165552  | -3.356744 | -1.431983 |
| c       | 0.268070  | -2.585904 | -0.305328 |
| c       | 0.153057  | -1.279054 | -0.747376 |
| c       | 0.175248  | -0.051776 | 0.020468  |
| c       | -0.111637 | 0.035518  | 1.328905  |
| c       | -0.015096 | 1.327438  | 2.027668  |
| o       | 0.226704  | 2.405042  | 1.527044  |
| o       | -0.239774 | 1.173499  | 3.363083  |
| h       | -0.072603 | -2.874455 | -3.508041 |
| h       | 0.239733  | -4.361733 | -1.472779 |
| h       | 0.417844  | -3.010722 | 0.672226  |
| h       | 0.418126  | 0.853941  | -0.525890 |
| h       | -0.397358 | -0.826955 | 1.917493  |
| h       | -0.167992 | 2.063250  | 3.742947  |
| 16      |           |           |           |
| N1H-TCC |           |           |           |
| n       | 0.176191  | -1.554440 | -2.205104 |

|         |           |           |           |
|---------|-----------|-----------|-----------|
| c       | -0.054519 | -2.873708 | -2.400470 |
| n       | -0.137277 | -3.546561 | -1.255802 |
| c       | 0.053490  | -2.607947 | -0.291233 |
| c       | 0.286948  | -1.350352 | -0.849978 |
| c       | 0.404491  | -0.101188 | -0.160922 |
| c       | 0.603510  | 1.170845  | -0.582755 |
| c       | 0.650068  | 1.648050  | -1.962941 |
| o       | 0.638537  | 0.986626  | -2.992298 |
| o       | 0.732597  | 2.998973  | -2.003574 |
| h       | -0.154728 | -3.303555 | -3.383644 |
| h       | 0.325270  | -0.811187 | -2.884802 |
| h       | 0.042199  | -2.860385 | 0.757880  |
| h       | 0.395808  | -0.228223 | 0.917779  |
| h       | 0.663276  | 1.947505  | 0.166838  |
| h       | 0.782333  | 3.233556  | -2.944032 |
| 16      |           |           |           |
| N1H-TCT |           |           |           |
| n       | 0.145530  | -1.570467 | -2.209189 |
| c       | -0.099934 | -2.892287 | -2.388712 |
| n       | -0.156902 | -3.552732 | -1.238584 |
| c       | 0.070640  | -2.605535 | -0.287743 |
| c       | 0.299559  | -1.355345 | -0.860473 |
| c       | 0.440540  | -0.108408 | -0.163659 |
| c       | 0.607908  | 1.181692  | -0.537444 |
| c       | 0.608331  | 1.822545  | -1.854552 |
| o       | 0.809756  | 0.982360  | -2.925679 |
| o       | 0.480672  | 3.016116  | -2.023303 |
| h       | -0.230482 | -3.327394 | -3.365988 |
| h       | 0.302115  | -0.858372 | -2.910114 |
| h       | 0.083957  | -2.848130 | 0.763390  |
| h       | 0.457803  | -0.262393 | 0.911769  |
| h       | 0.649685  | 1.918170  | 0.253933  |
| h       | 0.799942  | 1.568439  | -3.699999 |
| 16      |           |           |           |
| N1H-CTT |           |           |           |
| n       | -0.144104 | -1.332125 | -2.116369 |
| c       | 0.222571  | -2.526028 | -2.652590 |
| n       | 0.764649  | -3.320745 | -1.743301 |
| c       | 0.716570  | -2.614525 | -0.575234 |
| c       | 0.126932  | -1.370781 | -0.761107 |
| c       | -0.039740 | -0.177137 | 0.037024  |
| c       | -0.197032 | -0.009819 | 1.365531  |
| c       | -0.311275 | -1.013964 | 2.437155  |
| o       | -0.643805 | -2.255542 | 2.006787  |
| o       | -0.161057 | -0.746206 | 3.612410  |
| h       | 0.076313  | -2.764446 | -3.693068 |
| h       | -0.637133 | -0.592181 | -2.593668 |
| h       | 1.110709  | -3.017471 | 0.340166  |
| h       | -0.017048 | 0.745464  | -0.539609 |
| h       | -0.220540 | 1.002176  | 1.747767  |
| h       | -0.706223 | -2.798814 | 2.808917  |
| 16      |           |           |           |
| N1H-CCC |           |           |           |
| n       | 0.002645  | -1.260081 | -2.145845 |
| c       | 0.210903  | -2.476453 | -2.711128 |
| n       | 0.442901  | -3.404542 | -1.796621 |
| c       | 0.361930  | -2.758920 | -0.595606 |
| c       | 0.050144  | -1.411453 | -0.769810 |
| c       | -0.018307 | -0.230443 | 0.054188  |
| c       | -0.237737 | -0.063617 | 1.375786  |
| c       | -0.432257 | -1.123773 | 2.370930  |
| o       | -0.234526 | -2.313157 | 2.231639  |

|         |           |           |           |
|---------|-----------|-----------|-----------|
| o       | -0.895408 | -0.594469 | 3.538064  |
| h       | 0.185285  | -2.632821 | -3.777031 |
| h       | -0.261443 | -0.416573 | -2.632630 |
| h       | 0.511402  | -3.271169 | 0.335592  |
| h       | 0.058621  | 0.697392  | -0.508914 |
| h       | -0.286636 | 0.946779  | 1.757937  |
| h       | -0.992175 | -1.345170 | 4.144999  |
| 16      |           |           |           |
| N3H-TCC |           |           |           |
| n       | -0.251573 | -1.333794 | -2.122139 |
| c       | -0.153623 | -2.593546 | -2.495888 |
| n       | 0.247152  | -3.396184 | -1.466737 |
| c       | 0.407689  | -2.600166 | -0.363124 |
| c       | 0.109222  | -1.320756 | -0.790096 |
| c       | 0.141577  | -0.091815 | -0.012101 |
| c       | 0.447551  | 1.113945  | -0.512512 |
| c       | 0.962181  | 1.333309  | -1.887279 |
| o       | 1.902057  | 0.763847  | -2.393919 |
| o       | 0.291630  | 2.344608  | -2.500644 |
| h       | -0.371247 | -2.980113 | -3.477759 |
| h       | 0.381347  | -4.394678 | -1.506027 |
| h       | 0.734231  | -2.987408 | 0.586739  |
| h       | -0.144865 | -0.159476 | 1.032381  |
| h       | 0.343711  | 2.000884  | 0.099906  |
| h       | 0.710581  | 2.443259  | -3.370701 |
| 16      |           |           |           |
| N3H-TCT |           |           |           |
| n       | 0.145395  | -1.542299 | -2.208051 |
| c       | 0.023697  | -2.830644 | -2.460088 |
| n       | 0.041465  | -3.551713 | -1.307266 |
| c       | 0.178688  | -2.676029 | -0.263576 |
| c       | 0.223770  | -1.417962 | -0.837960 |
| c       | 0.422354  | -0.163119 | -0.141735 |
| c       | 0.462700  | 1.107899  | -0.592593 |
| c       | 0.483594  | 1.717141  | -1.960939 |
| o       | 0.181457  | 0.988238  | -3.039119 |
| o       | 0.747880  | 2.900393  | -2.060654 |
| h       | -0.073822 | -3.279710 | -3.433961 |
| h       | -0.034014 | -4.555065 | -1.236261 |
| h       | 0.209662  | -2.999006 | 0.762511  |
| h       | 0.469013  | -0.274178 | 0.937755  |
| h       | 0.607943  | 1.876144  | 0.156775  |
| h       | 0.111672  | 0.022289  | -2.827024 |
| 16      |           |           |           |
| N3H-CCT |           |           |           |
| n       | 0.036174  | -1.250023 | -2.150391 |
| c       | 0.217910  | -2.439529 | -2.681952 |
| n       | 0.377761  | -3.395619 | -1.721258 |
| c       | 0.284662  | -2.785185 | -0.501229 |
| c       | 0.058502  | -1.445967 | -0.776751 |
| c       | -0.011443 | -0.255796 | 0.048616  |
| c       | -0.162523 | -0.030691 | 1.370085  |
| c       | -0.263513 | -0.955828 | 2.505051  |
| o       | -0.579598 | -2.241429 | 2.178662  |
| o       | -0.112585 | -0.613641 | 3.661009  |
| h       | 0.247141  | -2.665140 | -3.735055 |
| h       | 0.519624  | -4.381947 | -1.876853 |
| h       | 0.365249  | -3.325928 | 0.421107  |
| h       | 0.044090  | 0.638384  | -0.565021 |
| h       | -0.135443 | 0.999289  | 1.700741  |
| h       | -0.639152 | -2.700892 | 3.031818  |



N3H-CCC

|   |           |           |           |
|---|-----------|-----------|-----------|
| n | 0.142475  | -1.226197 | -2.151702 |
| c | 0.301590  | -2.419167 | -2.682011 |
| n | 0.309593  | -3.394110 | -1.726270 |
| c | 0.140208  | -2.795021 | -0.509637 |
| c | 0.023694  | -1.439618 | -0.784352 |
| c | -0.067402 | -0.262286 | 0.050479  |
| c | -0.272407 | -0.077775 | 1.372012  |
| c | -0.364635 | -1.108395 | 2.407668  |
| o | -0.368402 | -2.316701 | 2.263038  |
| o | -0.462939 | -0.537108 | 3.640613  |
| h | 0.417352  | -2.635242 | -3.731283 |
| h | 0.394820  | -4.386657 | -1.884642 |
| h | 0.094646  | -3.341832 | 0.412198  |
| h | -0.022543 | 0.643501  | -0.546316 |
| h | -0.310071 | 0.939305  | 1.737360  |
| h | -0.536235 | -1.276901 | 4.263689  |
